# Supplementary material for: Preliminary Air Quality and Microclimatic Conditions Study in the Santuario della Beata Vergine dei Miracoli in Saronno (VA)
Source: MDPI journal article supplement (doi:10.3390/molecules28041615), 2023-02-07
Supplement: s1 [file s1]

Supplementary Materials

Figure S1. Average daily temperature trends in the Sanctuary.

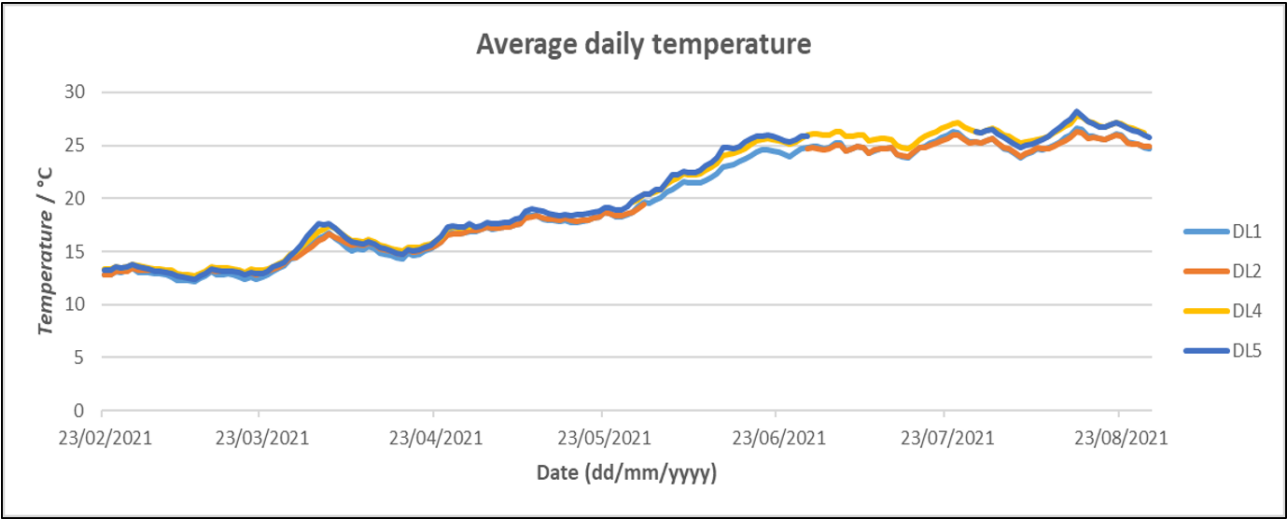

Figure S2. Average daily relative humidity trends in the Sanctuary.

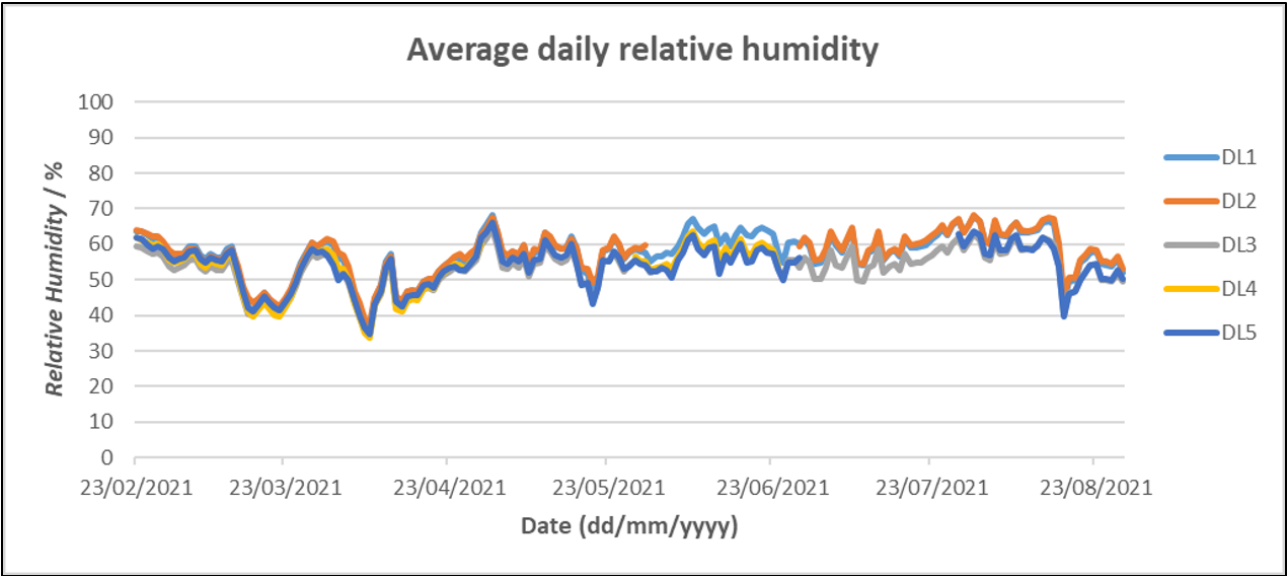

**Figure S3.** Particulate matter dimensional class distribution for the sampling site *Deposition*. The ranges of the dimensional class are expressed in  $\mu\text{m}$ .

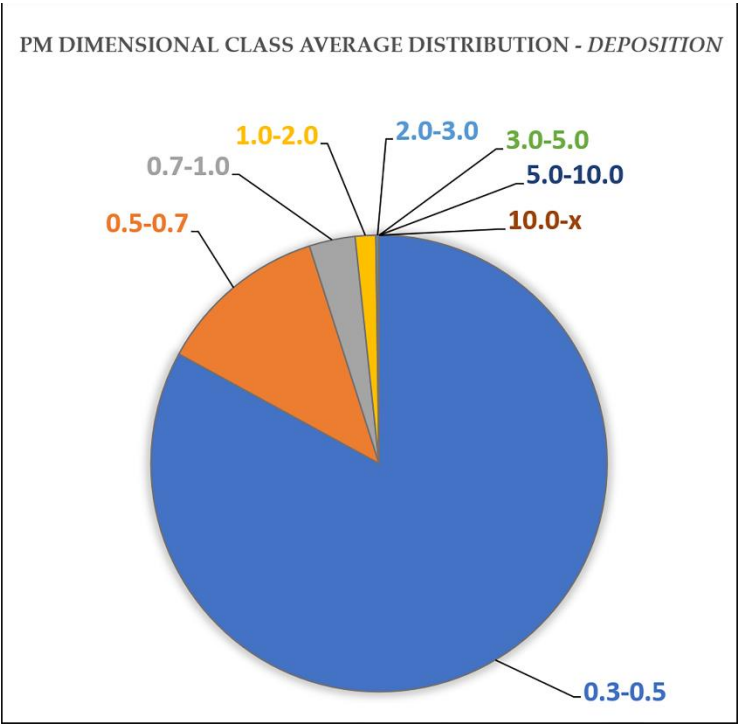

**Figure S4.** Particulate matter dimensional class distribution for the sampling site *Choir*. The ranges of the dimensional class are expressed in  $\mu\text{m}$ .

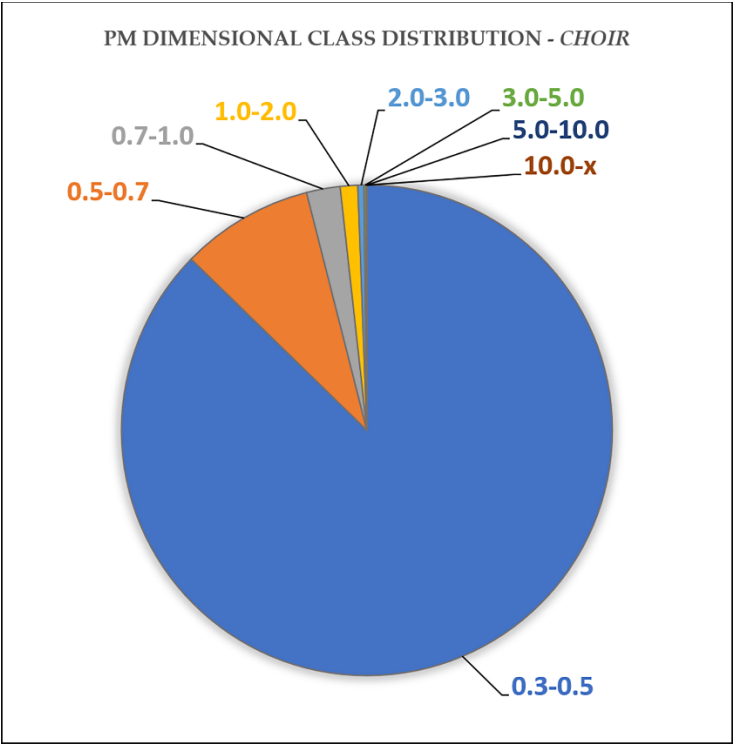

**Table S1.** PM10, PM2.5 and PM1 average daily concentrations for the sampling site *Last Supper*.

| Date       | PM10 concentration / $\mu\text{g m}^{-3}$ | PM2.5 concentration / $\mu\text{g m}^{-3}$ | PM1 concentration / $\mu\text{g m}^{-3}$ |
|------------|-------------------------------------------|--------------------------------------------|------------------------------------------|
| 03/25/2021 | 20.4                                      | 18.1                                       | 16.7                                     |
| 03/26/2021 | 19.4                                      | 15.9                                       | 13.5                                     |
| 03/27/2021 | 15.1                                      | 13.9                                       | 12.5                                     |
| 03/28/2021 | 40.8                                      | 38.3                                       | 32.0                                     |
| 03/29/2021 | 17.2                                      | 15.7                                       | 14.1                                     |
| 03/30/2021 | 21.6                                      | 19.7                                       | 18.1                                     |
| 03/31/2021 | 41.0                                      | 38.9                                       | 34.7                                     |
| 04/01/2021 | 38.5                                      | 36.0                                       | 31.5                                     |
| 04/02/2021 | 66.6                                      | 63.4                                       | 56.3                                     |
| 04/03/2021 | 31.5                                      | 28.9                                       | 23.5                                     |
| 04/04/2021 | 40.3                                      | 38.4                                       | 33.0                                     |
| 04/05/2021 | 15.6                                      | 14.2                                       | 11.6                                     |
| 04/06/2021 | 5.4                                       | 2.8                                        | 1.8                                      |
| 04/07/2021 | 2.8                                       | 2.0                                        | 1.6                                      |
| 04/08/2021 | 13.1                                      | 11.7                                       | 9.8                                      |
| 04/09/2021 | 9.7                                       | 6.3                                        | 4.2                                      |
| 04/10/2021 | 7.8                                       | 5.0                                        | 3.6                                      |
| 04/11/2021 | 7.9                                       | 6.9                                        | 6.3                                      |
| 04/12/2021 | 3.6                                       | 3.0                                        | 2.8                                      |
| 04/13/2021 | 3.1                                       | 2.2                                        | 1.7                                      |
| 04/14/2021 | 5.3                                       | 4.5                                        | 3.9                                      |
| 04/15/2021 | 4.7                                       | 3.7                                        | 3.1                                      |
| 04/16/2021 | 8.5                                       | 5.6                                        | 4.1                                      |
| 04/17/2021 | 10.7                                      | 9.7                                        | 8.9                                      |
| 04/18/2021 | 17.6                                      | 16.4                                       | 15.6                                     |
| 04/19/2021 | 16.6                                      | 13.6                                       | 12.4                                     |
| 04/20/2021 | 12.4                                      | 11.6                                       | 10.9                                     |
| 04/21/2021 | 7.2                                       | 6.2                                        | 5.7                                      |
| 04/22/2021 | 9.2                                       | 8.5                                        | 7.9                                      |
| 04/23/2021 | 17.3                                      | 16.3                                       | 15.2                                     |
| 04/24/2021 | 20.8                                      | 19.2                                       | 17.2                                     |
| 04/25/2021 | 45.6                                      | 42.9                                       | 36.7                                     |
| 04/26/2021 | 35.9                                      | 34.3                                       | 31.0                                     |
| 04/27/2021 | 11.3                                      | 10.4                                       | 9.3                                      |
| 04/28/2021 | 17.6                                      | 16.9                                       | 16.0                                     |
| 04/29/2021 | 21.5                                      | 21.0                                       | 20.2                                     |
| 04/30/2021 | 8.4                                       | 6.5                                        | 5.3                                      |
| 05/01/2021 | 12.2                                      | 11.1                                       | 10.2                                     |
| 05/02/2021 | 41.0                                      | 39.2                                       | 37.1                                     |
| 05/03/2021 | 11.2                                      | 10.2                                       | 9.4                                      |
| 05/04/2021 | 6.7                                       | 5.9                                        | 5.1                                      |
| 05/05/2021 | 4.9                                       | 4.2                                        | 3.3                                      |
| 05/06/2021 | 22.1                                      | 21.1                                       | 17.5                                     |
| 05/07/2021 | 50.0                                      | 49.1                                       | 44.7                                     |
| 11/23/2021 | 12.6                                      | 11.1                                       | 12.1                                     |
| 11/28/2021 | 10.0                                      | 7.7                                        | 7.0                                      |

**Table S2.** PM10, PM2.5 and PM1 average daily concentrations for the sampling site *Choir*.

| Date       | PM10 concentration / $\mu\text{g m}^{-3}$ | PM2.5 concentration / $\mu\text{g m}^{-3}$ | PM1 concentration / $\mu\text{g m}^{-3}$ |
|------------|-------------------------------------------|--------------------------------------------|------------------------------------------|
| 05/27/2021 | 5.2                                       | 4.0                                        | 3.0                                      |
| 05/28/2021 | 6.0                                       | 4.8                                        | 3.8                                      |
| 05/29/2021 | 10.8                                      | 9.5                                        | 7.5                                      |
| 05/30/2021 | 27.4                                      | 25.5                                       | 22.1                                     |
| 05/31/2021 | 16.1                                      | 15.0                                       | 13.6                                     |
| 06/01/2021 | 8.2                                       | 7.0                                        | 6.2                                      |
| 06/02/2021 | 8.3                                       | 7.3                                        | 6.7                                      |
| 06/03/2021 | 12.2                                      | 10.7                                       | 9.8                                      |
| 06/04/2021 | 8.3                                       | 6.9                                        | 6.1                                      |
| 06/05/2021 | 6.0                                       | 5.1                                        | 4.2                                      |
| 12/09/2021 | 27.1                                      | 25.9                                       | 23.7                                     |
| 12/12/2021 | 20.8                                      | 18.5                                       | 17.4                                     |
